# Supplementary material for: Polymorphism of chitosan-based networks stabilized by phytate investigated by molecular dynamics simulations
Source: Royal Society of Chemistry journal article supplement (doi:10.1039/d1cp02961d), 2021-01-01
Supplement: d1cp02961d1.pdf [file d1cp02961d1.pdf]

## Electronic Supplementary Information

### Polymorphism of chitosan-based networks stabilized by phytate

#### investigated by molecular dynamics simulations

Raluca M. Visan, Anca R. Leonties, Ludmila Aricov, Viorel Chihaiia, Daniel G. Angelescu\*

**Table S1.** The atom charges in the united atom representation for the chitosan and phytate

| Chitosan        |             |                        | Phytate   |           |                        |
|-----------------|-------------|------------------------|-----------|-----------|------------------------|
| Atom type       | Atom Name   | Charge( <i>e</i> unit) | Atom type | Atom Name | Charge( <i>e</i> unit) |
| CH1R            | C1          | 0.464                  | C         | C         | -0.015                 |
|                 | C2          | 0.197                  |           | C2        | 0.142                  |
| CH2             | C3 C4 C5    | 0.232                  |           | C3        | 0.016                  |
|                 | C6          | 0.232                  |           | C4        | -0.040                 |
| OA              | O1 O3 O4 O6 | -0.642                 | Cpos      | C1        | 0.198                  |
|                 |             |                        |           | C5        | 0.258                  |
| OR              | O5          | -0.464                 | OAlc      | O18       | -0.406                 |
|                 |             |                        |           | O19       | -0.457                 |
|                 |             |                        |           | O20       | -0.437                 |
|                 |             |                        |           | O21       | -0.443                 |
|                 |             |                        |           | O22       | -0.421                 |
|                 |             |                        | OM        | O23       | -0.464                 |
|                 |             |                        |           | O         | -0.766                 |
|                 |             |                        |           | O1        | -0.749                 |
|                 |             |                        |           | O2        | -0.762                 |
|                 |             |                        |           | O3        | -0.756                 |
|                 |             |                        |           | O4        | -0.771                 |
| OEOp            | O5          | -0.753                 |           |           |                        |
|                 | O6          | -0.759                 |           |           |                        |
|                 | O8          | -0.718                 |           |           |                        |
|                 | O11         | -0.765                 |           |           |                        |
|                 | O12         | -0.721                 |           |           |                        |
|                 | O14         | -0.797                 |           |           |                        |
|                 | O16         | -0.754                 |           |           |                        |
| NT (CHT0, CHTN) | N2          | -0.845                 | O7        | -0.705    |                        |
|                 |             |                        | O9        | -0.701    |                        |
|                 |             |                        | O10       | -0.697    |                        |
|                 |             |                        | O13       | -0.701    |                        |
|                 |             |                        | O15       | -0.709    |                        |
|                 |             |                        | O17       | -0.690    |                        |

|           |     |     |              |      |     |       |
|-----------|-----|-----|--------------|------|-----|-------|
| NL (CHTP) | N2  |     | -0.448       | P    | P   | 1.013 |
|           |     |     |              |      | P1  | 1.018 |
|           |     |     |              |      | P2  | 0.975 |
|           |     |     |              |      | P3  | 1.038 |
|           |     |     |              |      | P4  | 1.022 |
|           |     |     |              |      | P5  | 1.007 |
| H         | HO1 | HO3 | 0.410        | HC   | H   | 0.097 |
|           | HO4 | HO6 |              |      | H1  | 0.097 |
|           | H21 | H22 | 0.324        |      | H2  | 0.125 |
|           |     | H23 | 0.407 – CHTP |      | H3  | 0.114 |
|           |     |     |              |      | H4  | 0.091 |
|           |     |     |              |      | H5  | 0.078 |
|           |     |     |              | HS14 | H7  | 0.435 |
|           |     |     |              |      | H9  | 0.459 |
|           |     |     |              |      | H10 | 0.436 |
|           |     |     |              |      | H13 | 0.460 |
|           |     |     |              |      | H15 | 0.444 |
|           |     |     |              |      | H17 | 0.434 |

**Table S2.** Lennard-Jones interaction parameters for the atom types

| Atom type | $C_6$ (kJ mol <sup>-1</sup> nm <sup>6</sup> ) | $C_{12}$ (kJ mol <sup>-1</sup> nm <sup>12</sup> ) |
|-----------|-----------------------------------------------|---------------------------------------------------|
| CH1R      | 0.00606841                                    | 9.70225e-05                                       |
| CH2       | 0.0074684164                                  | 3.3965584e-05                                     |
| CPos      | 0.002025                                      | 1e-06                                             |
| OA        | 0.0022619536                                  | 1.505529e-06                                      |
| OR        | 0.0022619536                                  | 1.21e-06                                          |
| OM        | 0.0022619536                                  | 7.4149321e-07                                     |
| OEOp      | 0.00308914                                    | 4.77422e-06                                       |
| OAlc      | 0.00177494                                    | 1.21e-06                                          |
| NT        | 0.0024364096                                  | 5.0625e-06                                        |
| NL        | 0.0024364096                                  | 2.319529e-06                                      |
| P         | 0.01473796                                    | 2.2193521e-05                                     |
| H         | 0                                             | 0                                                 |
| HC        | 8.464e-05                                     | 1.5129e-08                                        |
| HS14      | 0                                             | 0                                                 |

\* other parameters for special intramolecular Lennard-Jones interactions can be found in Table 10 of ref. (Naumov & Ignatov, 2017)

**Table S3.** Parameters for the bond interactions.

| Bond type                | $b_0$ (nm) | $K_b$ ( $10^6$ kJmol $^{-1}$ nm $^{-4}$ ) |
|--------------------------|------------|-------------------------------------------|
| <b>Chitosan</b>          |            |                                           |
| CH1R-OA, CH1R-OR, CH2-OA | 0.1435     | 6.1000e+06                                |
| CH1R-CH1R, CH1R-CH2      | 0.1520     | 5.4300e+06                                |
| OA-H                     | 0.1000     | 1.5700e+07                                |
| CH1R-NT,NL               | 0.1470     | 8.7100e+06                                |
| NT,NL-H                  | 0.1000     | 1.8700e+07                                |
| NT,NL-C                  | 0.1340     | 1.0500e+07                                |
| <b>Phytic acid</b>       |            |                                           |
| C-C                      | 0.1540     | 4.2166e+06                                |
| C-Cpos                   | 0.1560     | 3.0819e+06                                |
| Cpos-OAlc                | 0.1420     | 3.2236e+06                                |
| C-OAlc                   | 0.1410     | 6.5389e+06                                |
|                          | 0.1430     | 8.1800e+06                                |
| C-HC                     | 0.1090     | 1.2300e+07                                |
| OEOp-HS14                | 0.1010     | 1.5700e+07                                |
|                          | 0.1000     | 2.1076e+07                                |
| OEOp-P                   | 0.1630     | 4.7200e+06                                |
| OM-P                     | 0.1530     | 7.1500e+06                                |
|                          | 0.1500     | 8.3700e+06                                |
|                          | 0.1510     | 3.7279e+06                                |
| OAlc-P                   | 0.1660     | 2.9032e+06                                |
|                          | 0.1670     | 3.0478e+06                                |

**Table S4.** Number of H-bonds between the CT residues and PA averaged over the last 50 ns simulation time.

| System    | Residue type      |                                |
|-----------|-------------------|--------------------------------|
|           | CHTP<br>(charged) | CHT0, CHTN, CHT<br>(uncharged) |
| CT-083-10 | 98±4.9            | 8.7±2.2                        |
| CT-050-10 | 75±4.6            | 36.6±3.1                       |
| CT-033-10 | 56±4.1            | 48.2±4.4                       |

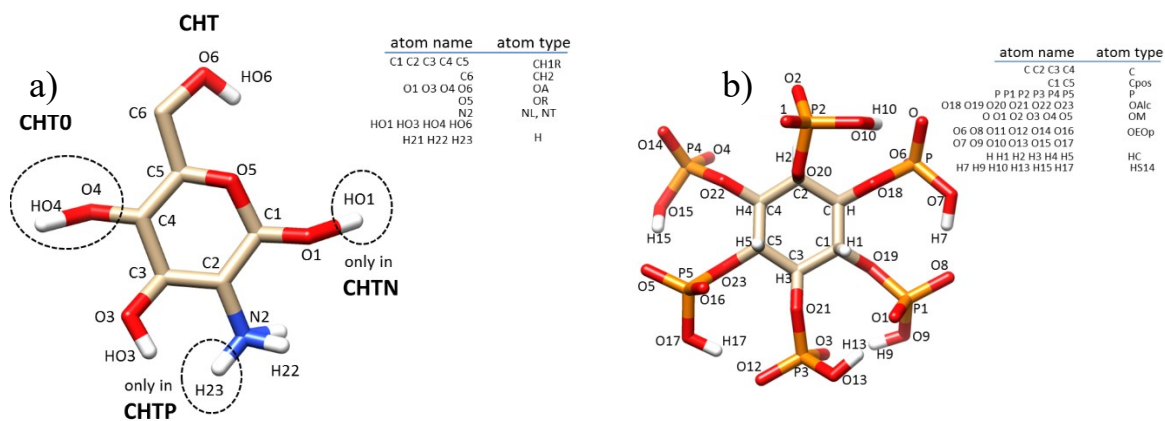

**Figure S1.** a) Types of monomers for the chitosan chain description and names and types of atoms according to the implemented force field; b) atom names and types for the atomistic representation of the phytate ion(cis-1,2,3,5-trans-4,6-cyclohexanehexol hexakisphosphate); the myo-isomer with five equatorial phosphate substituents at C, C1, C3, C5 and C4 and one axial phosphate substituent at C2 is shown in b).

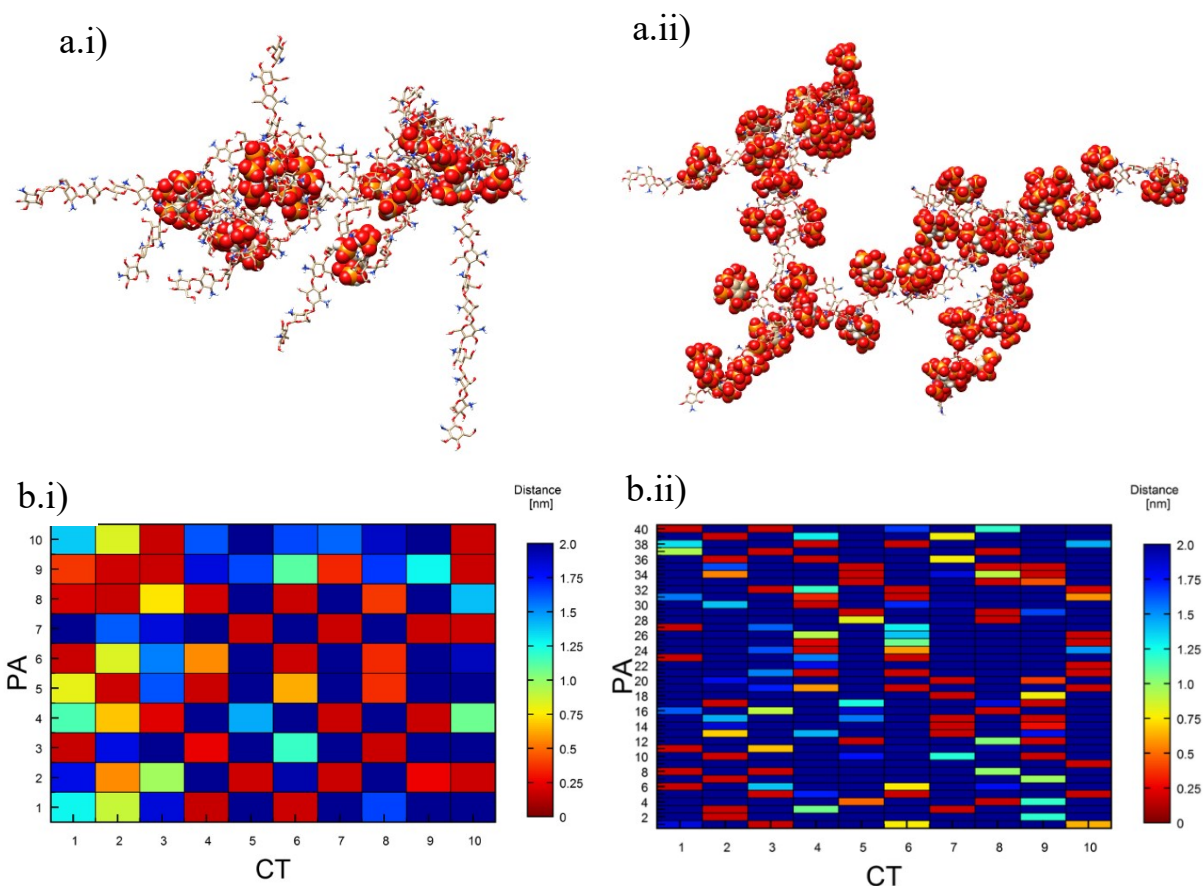

**Figure S2.** a) Snapshot of the final configuration and b) and minimum distance between CT and PA averaged over the last 50 ns simulation time interval for i) CT-083-10 and ii) CT-083-40; the water and counterions were omitted in a) for clarity sake.

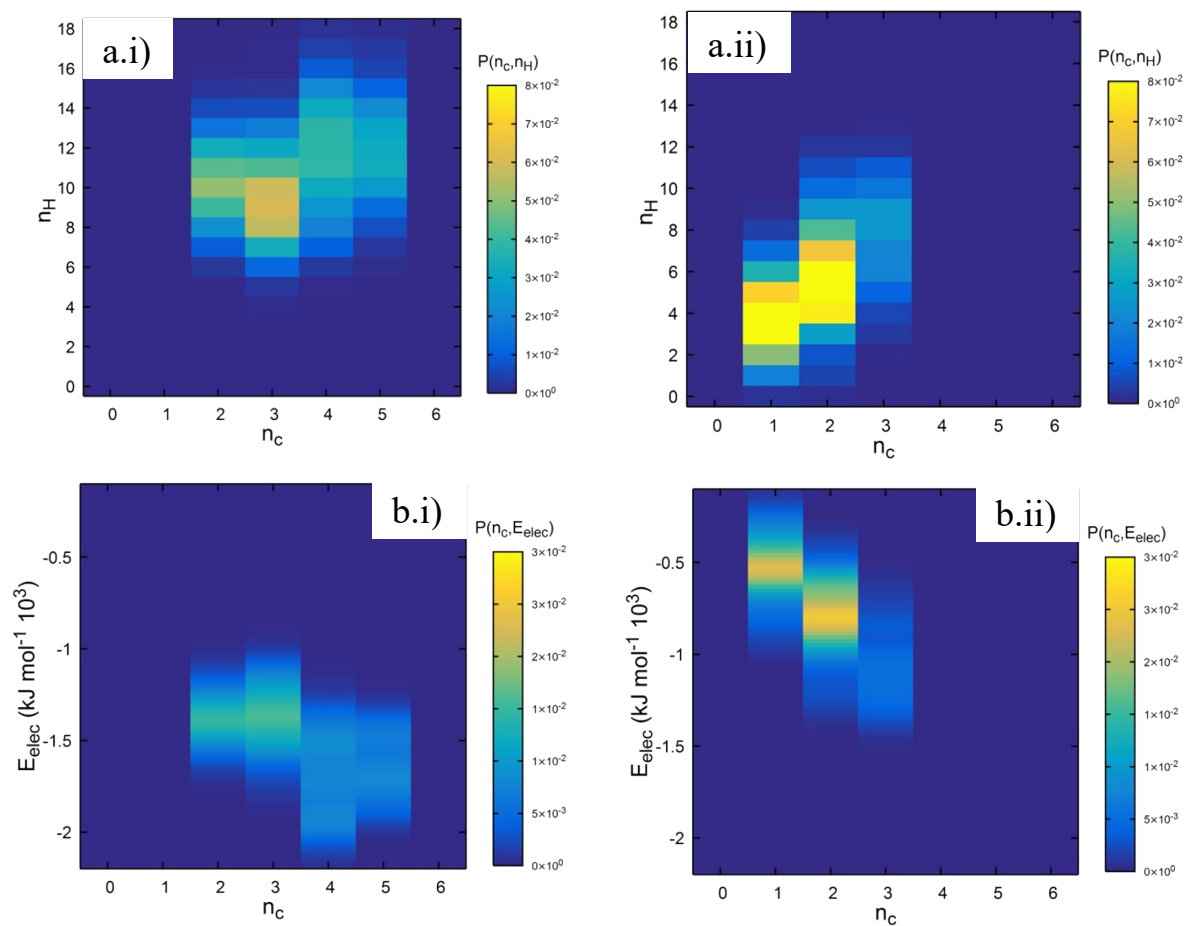

**Figure S3.** Probability distribution of the number of crosslinked chitosan chains by a PA  $n_c$  and a) H bond number  $n_H$  and b) electrostatic energy  $E_{elec}$  between anion and chitosan for i) CT-083-10, ii) CT-083-40

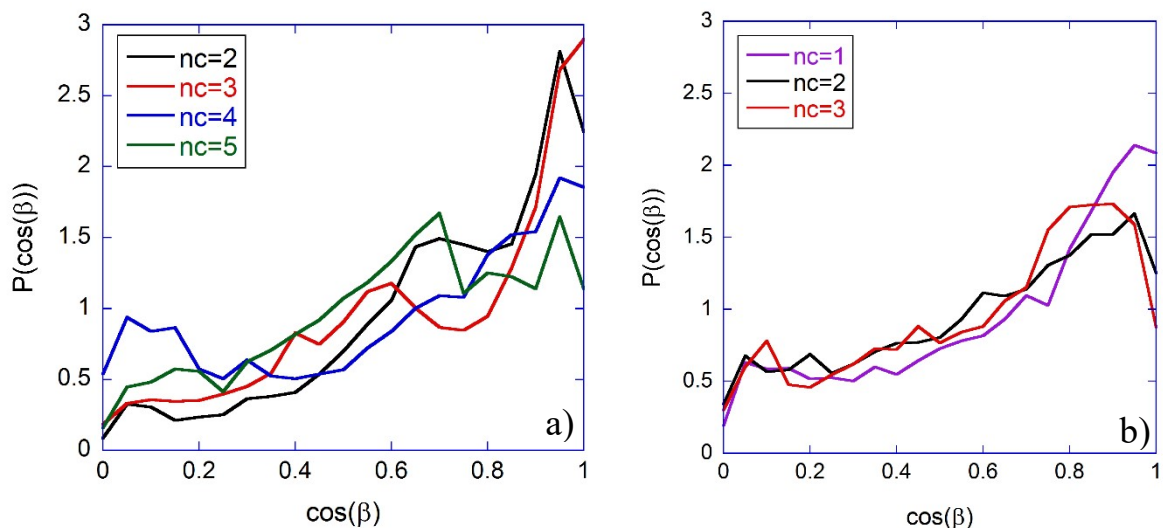

**Figure S4.** Probability distribution of the angle made by the inositol with the closest glucopyranose rings at the indicated number of crosslinked chains for a) CT-083-10, b) CT-083-40.

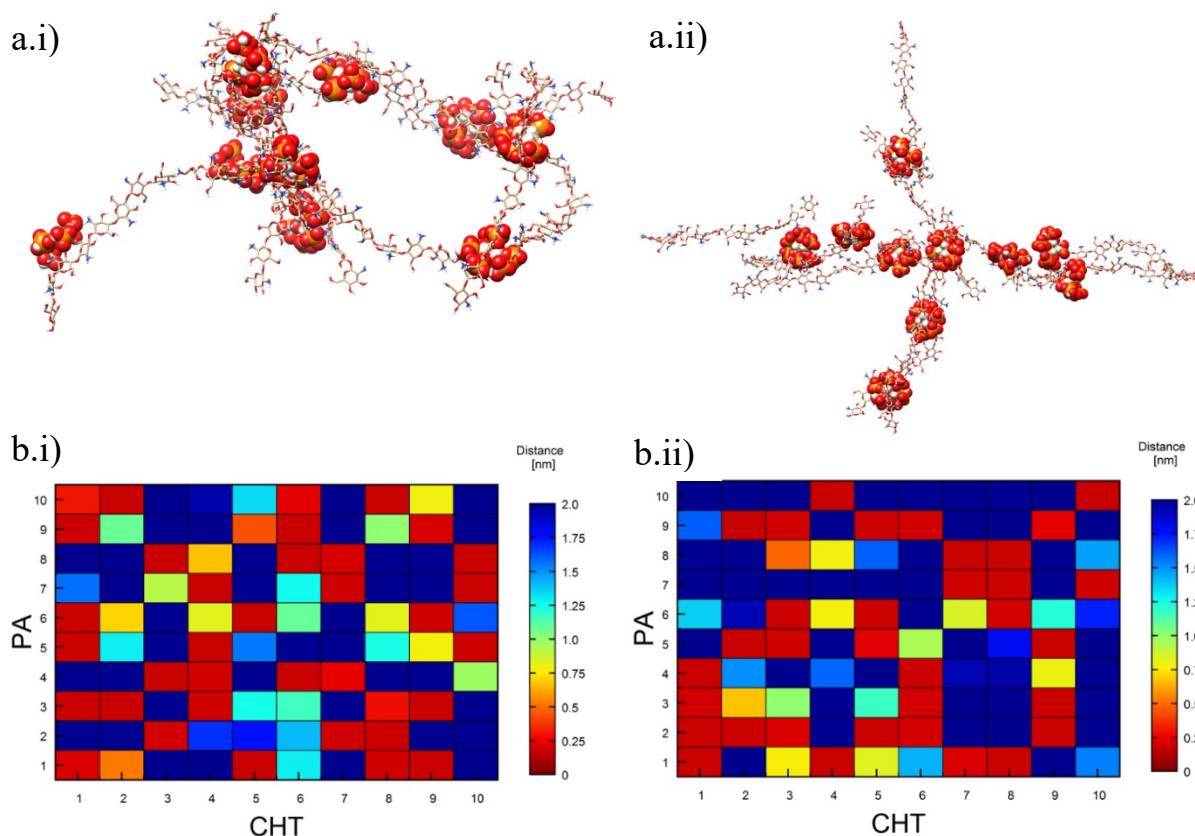

**Figure S5.** a) Snapshot of the final configuration and b) and minimum distance between CT and PA averaged over the last 50 ns simulation time interval for i) CT-050-10 and ii) CT-033-10.

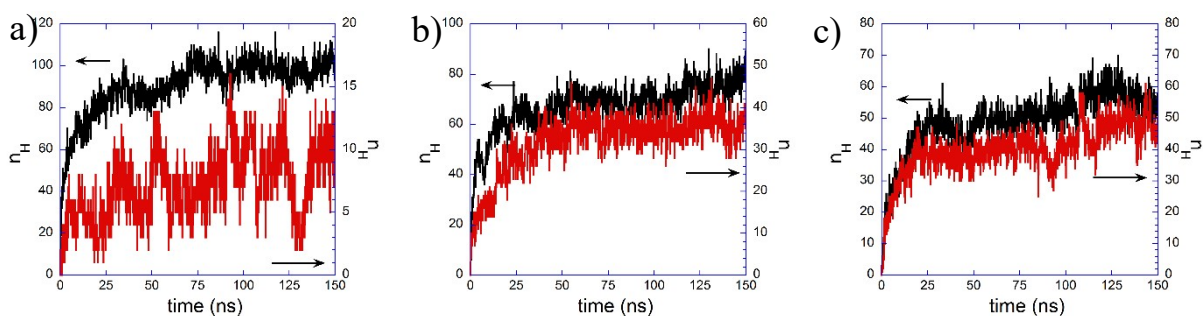

**Figure S6.** The time evolution of H bond number made by PA with charged (black curves) and uncharged (red curves) CT monomers for i) CT-83-10, ii) CT-50-10 and iii) CT-33-10.

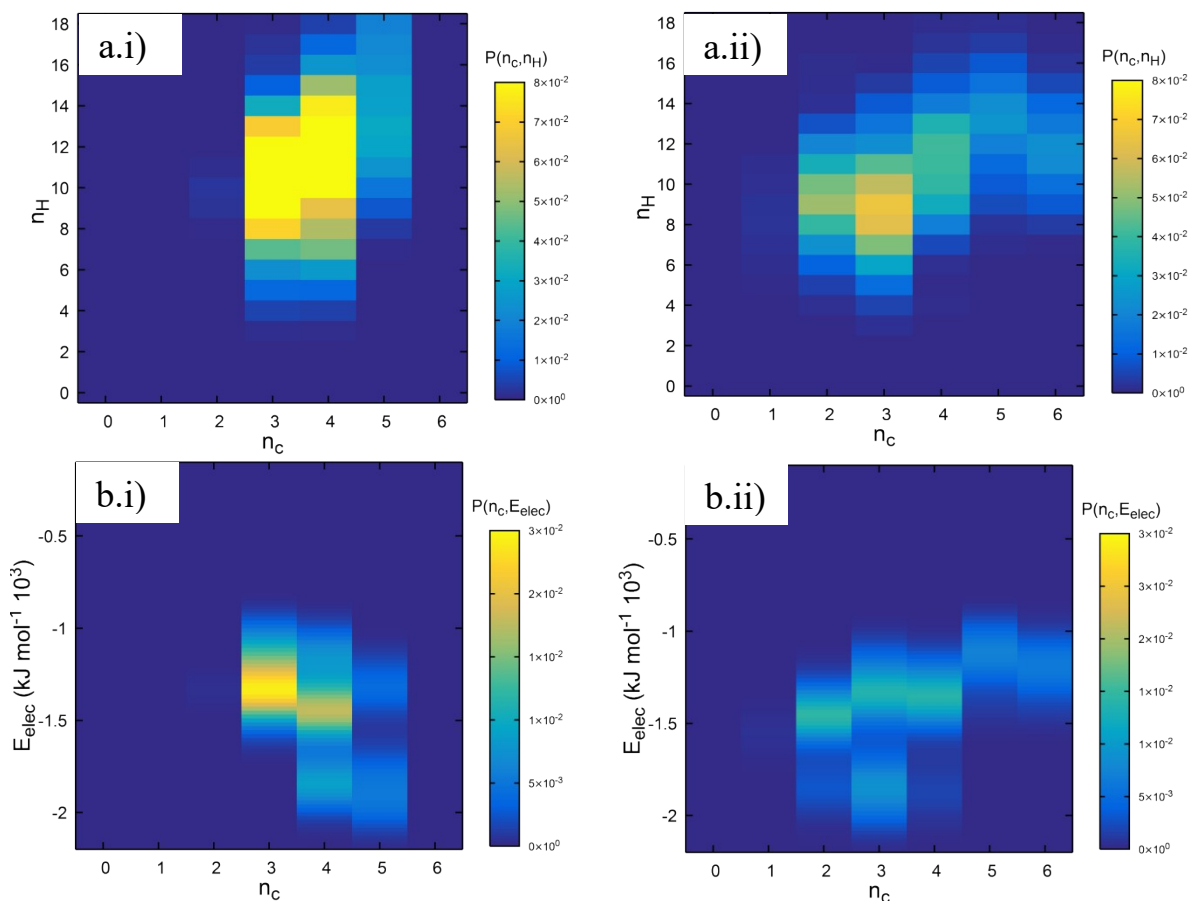

**Figure S7.** Probability distribution of the number of crosslinked chitosan chains by a PA  $n_c$  and a) H bond number  $n_H$  and b) electrostatic energy  $E_{elec}$  between the anion and chitosan chains for i) CT-050-10 and ii) CT-033-10.

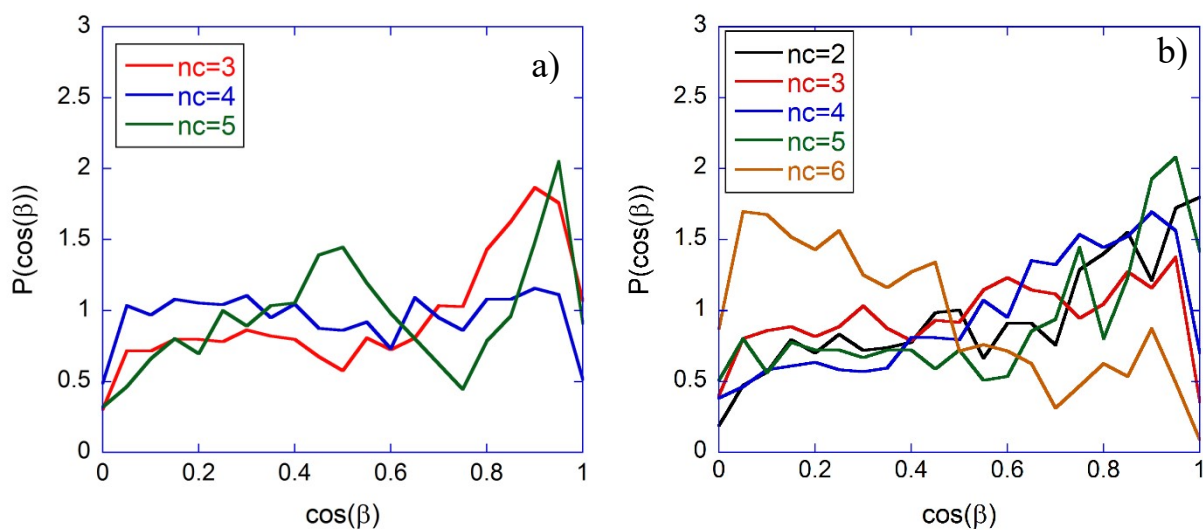

**Figure S8.** Probability distribution of the angle made by the inositol with the closest glucopyranose rings at the indicated number of crosslinked chains for a) CT-050-10, b) CT-033-10.

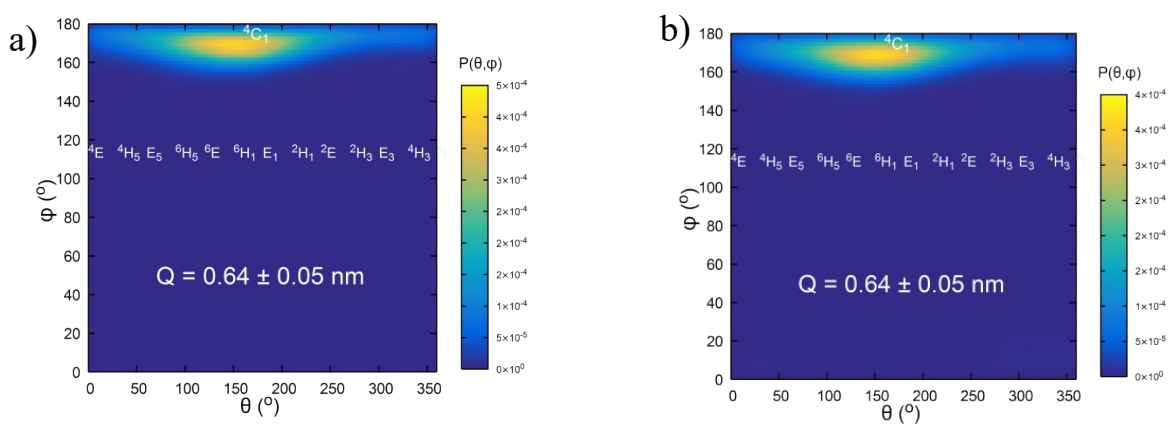

**Figure S9.** Probability distribution of puckering phase angles,  $\theta$  and  $\varphi$  for pyranose in a) CT-water system and b) CT-083-5. The puckering amplitude  $Q$  and location of the closest characteristic ring conformers ( ${}^4E \dots {}^4H_3$ ) are also given.



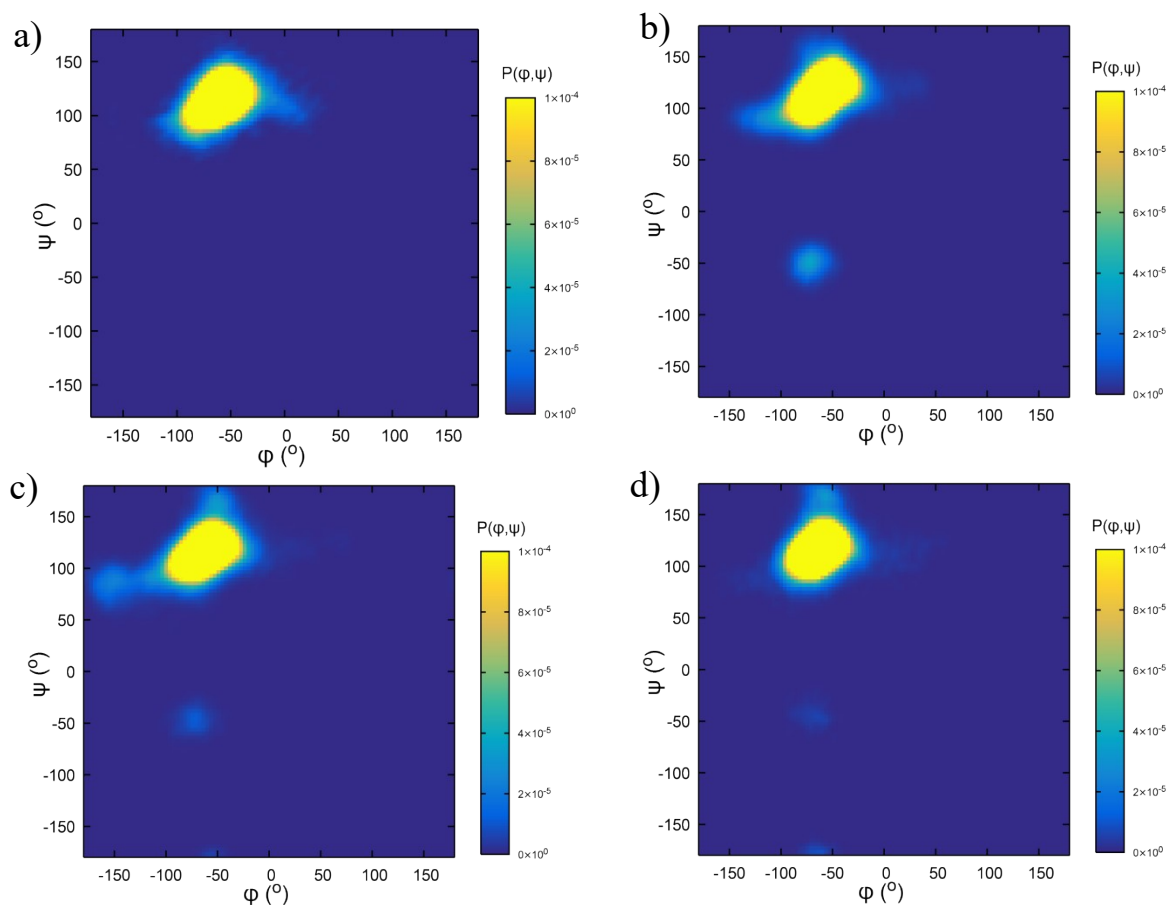

**Figure S10.** Probability distribution of the torsional angles of the chitosan chains  $\varphi$  and  $\psi$  for a) CT-083-10, b) CT-083-40, c) CT-050-10, d) CT-033-10.

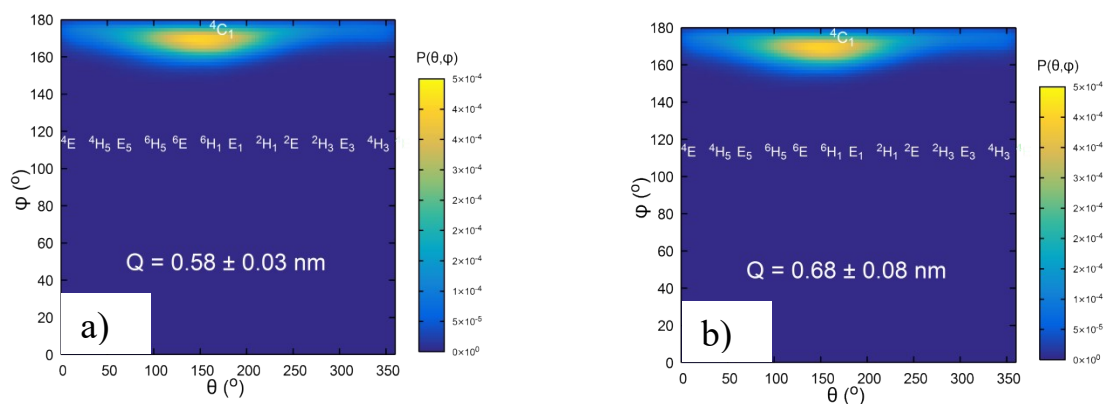

**Figure S11.** Probability distribution of puckering phase angles,  $\theta$  and  $\varphi$  of the inositol ring in a) phytate-water system and b) CT-083-5. The puckering amplitude  $Q$  and location of the closest characteristic ring conformers ( ${}^4E \dots {}^4H_3$ ) are also given.

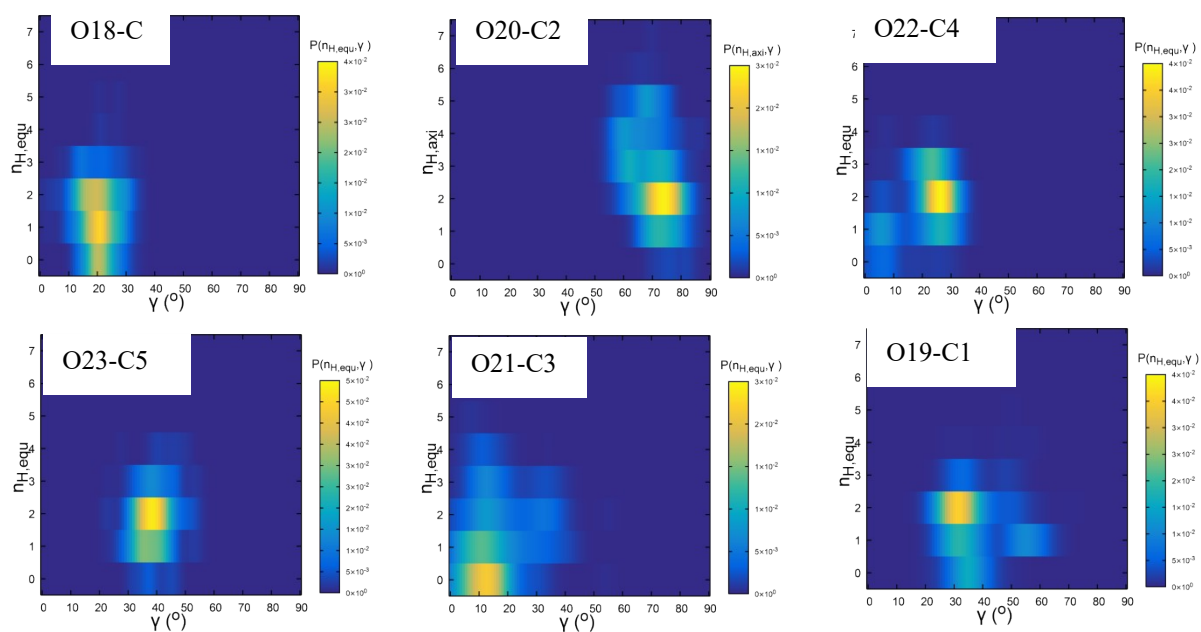

**Figure S12.** Pair probability distribution  $P(\gamma, n_H)$  of the angle  $\gamma$  made by C-O bonds with main plane of inositol and H bond number  $n_H$  of the phosphates substituted at the indicated inositol positions for CT-083-5.

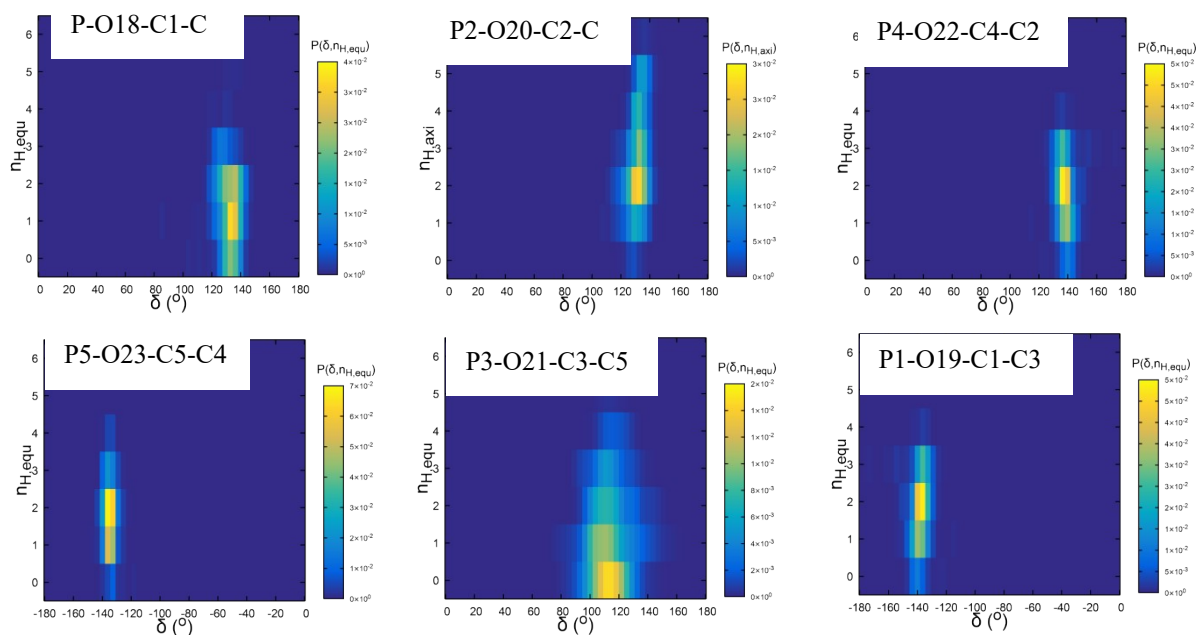

**Figure S13.** Pair probability distribution  $P(\delta, n_H)$  of dihedral angle along the six phosphoester bonds  $\delta$  and the H bond number  $n_H$  of the phosphates substituted at the indicated inositol positions in CT-083-5.
